# Supplementary material for: Microplastic Contamination and Ecological Status of Freshwater Ecosystems: A Case Study in Two Northern Portuguese Rivers
Source: MDPI journal article supplement (doi:10.3390/ijerph192315956), 2022-11-30
Supplement: s1 [file s1]

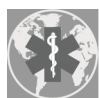

## Spatial and seasonal variation of the physicochemical parameters determined in Selho river

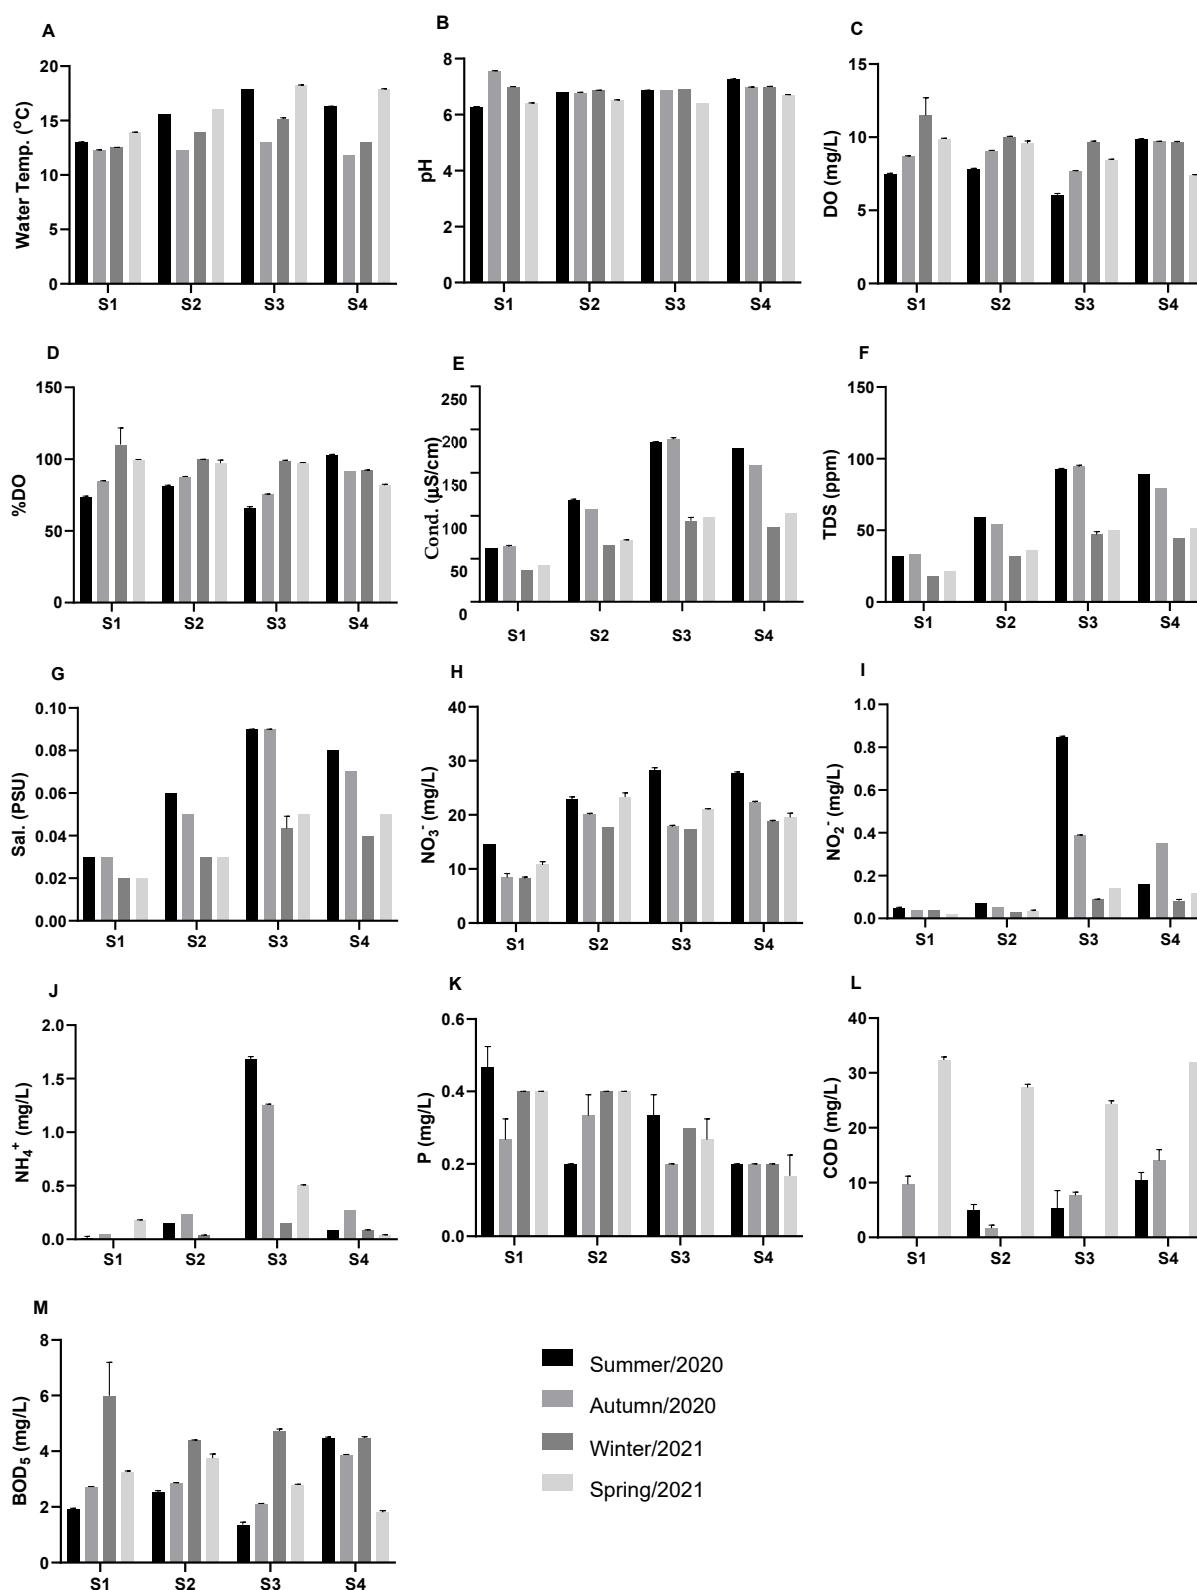

**Figure S1.** Spatial and seasonal variation of the physicochemical parameters determined at the sampling sites of Selho river (S1 to S4) in different seasons (summer and autumn of 2020, winter and spring of 2021). **A** Water temperature, Water Temp.; **B** pH; **C**

Dissolved oxygen concentration, DO; **D** Percent saturation of dissolved oxygen, %DO; **E** Conductivity, Cond.; **F** Salinity, Sal.; **G** Total dissolved solids, TDS; **H** nitrates,  $\text{NO}_3^-$ ; **I** Nitrites,  $\text{NO}_2^-$ ; **J** Ammonium ion,  $\text{NH}_4^+$ ; **K** Total phosphorus, P; **L** Chemical oxygen demand, COD; **M** Biochemical oxygen demand,  $\text{BOD}_5$ . Data are presented as mean  $\pm$  standard deviation.

## Spatial and seasonal variation of the physicochemical parameters determined in Costa-Couros river

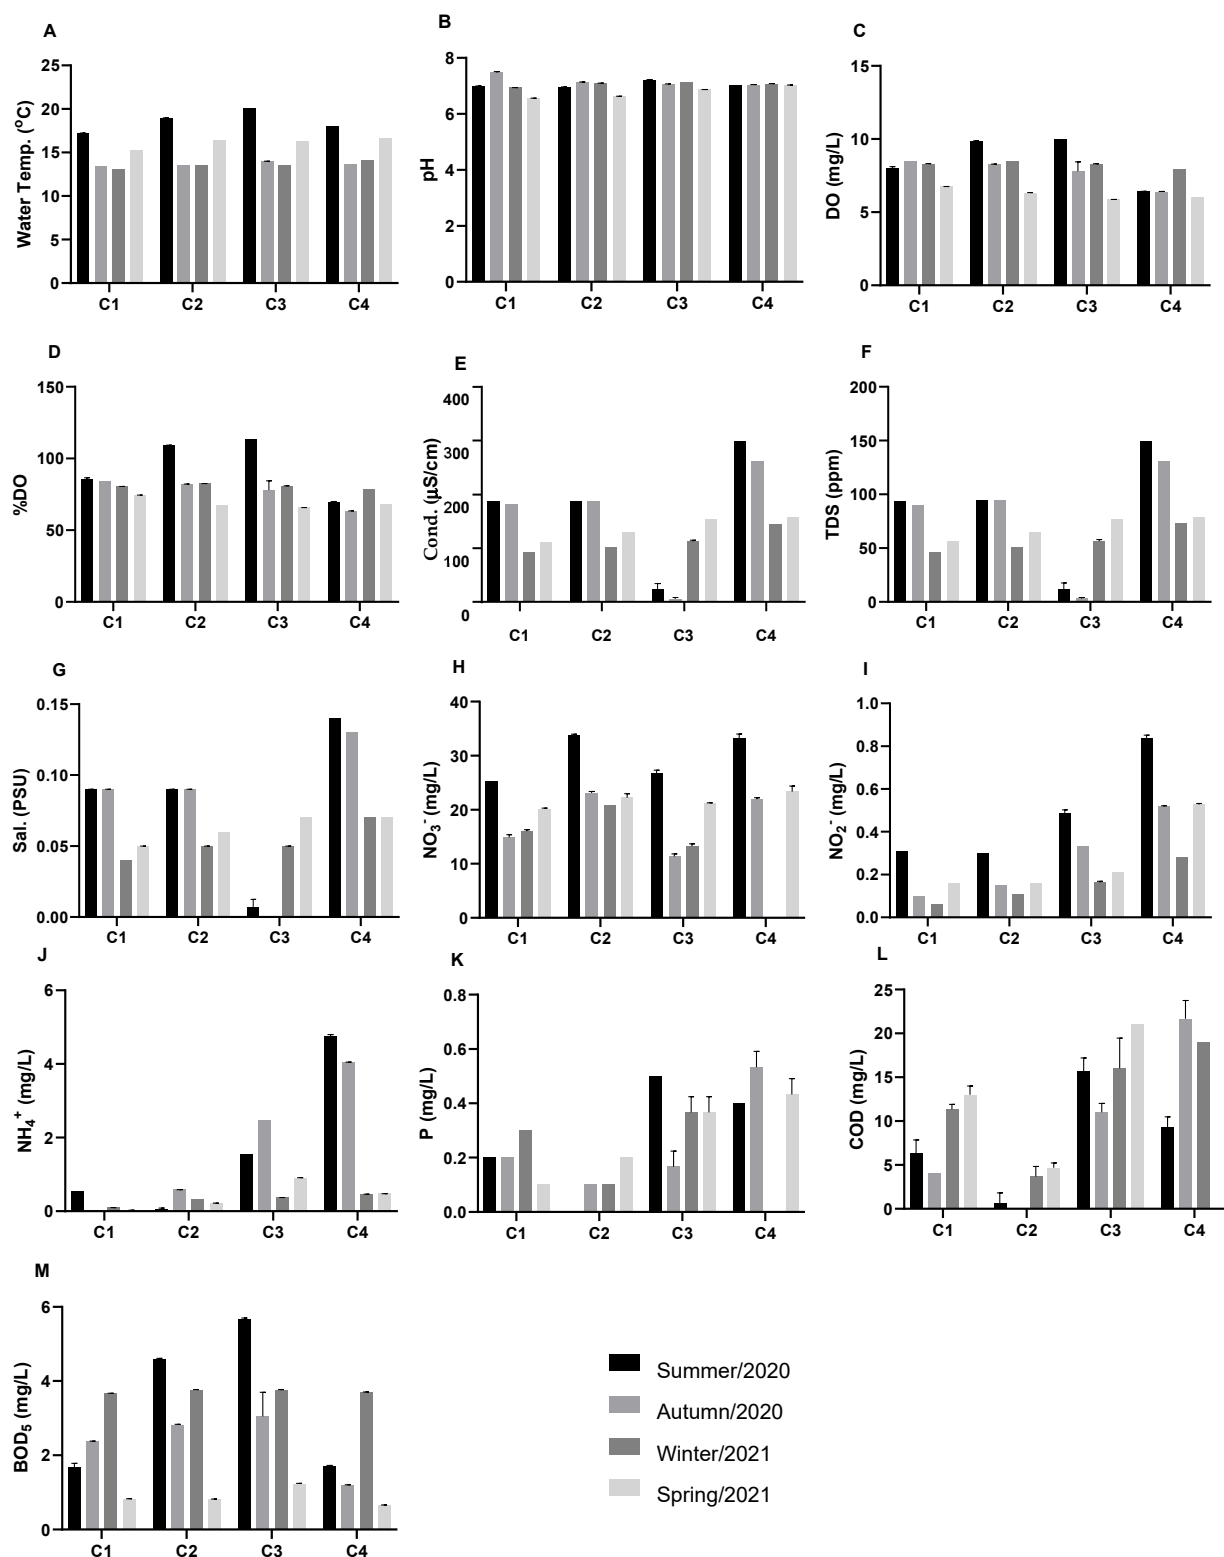

**Figure S2.** Spatial and seasonal variation of the physicochemical parameters determined at the sampling sites of Costa-Couros river (C1 to C4) in different seasons (summer and autumn of 2020, winter and spring of 2021). **A** Water temperature, Water Temp.; **B** pH; **C** Dissolved oxygen concentration, DO; **D** Percent saturation of dissolved oxygen, %DO; **E** Conductivity, Cond.; **F** Salinity, Sal.; **G** Total dissolved solids, TDS; **H** nitrates, NO<sub>3</sub><sup>-</sup>; **I** Nitrites, NO<sub>2</sub><sup>-</sup>; **J** Ammonium ion, NH<sub>4</sub><sup>+</sup>; **K** Total phosphorus, P; **L** Chemical oxygen demand, COD; **M** Biochemical oxygen demand, BOD<sub>5</sub>. Data are presented as mean ± standard deviation.

## Two-way ANOVA applied to the physicochemical parameters

**Table S1.** Results from the two-way ANOVA applied to the physicochemical parameters determined in Selho and Costa-Couros rivers: water temperature (Temp., °C), pH, dissolved oxygen concentration (DO, mg O<sub>2</sub>/L), percent saturation of dissolved oxygen (%DO), conductivity (Cond., µS/cm), salinity (Sal., PSU), total dissolved solids (TDS, mg/L), nitrates (NO<sub>3</sub><sup>-</sup>, mg/L), nitrites (NO<sub>2</sub><sup>-</sup>, mg/L), ammonium ion (NH<sub>4</sub><sup>+</sup>, mg/L), total phosphorus (P, mg/L), chemical oxygen demand (COD, mg/L) and biochemical oxygen demand (BOD<sub>5</sub>, mg/L). A significance level of 0.05 was considered for all tests.

| Spatial differences |                              |                                         | Seasonal differences                    |                                         | Interaction             |               |
|---------------------|------------------------------|-----------------------------------------|-----------------------------------------|-----------------------------------------|-------------------------|---------------|
|                     | % of total<br>variation      | ANOVA Summary                           | % of total<br>variation                 | ANOVA Summary                           | % of total<br>variation | ANOVA Summary |
| Selho<br>river      | Temp.                        | 27,37%<br>F (3, 32) = 21945<br>P<0,0001 | 60,17%<br>F (3, 32) = 48247<br>P<0,0001 | 12,45%<br>F (9, 32) = 3327<br>P<0,0001  |                         |               |
|                     | pH                           | 9,48%<br>F (3, 32) = 2050<br>P<0,0001   | 40,72%<br>F (3, 32) = 8804<br>P<0,0001  | 49,75%<br>F (9, 32) = 3585<br>P<0,0001  |                         |               |
|                     | DO                           | 17,23%<br>F (3, 32) = 51,91<br>P<0,0001 | 40,93%<br>F (3, 32) = 123,3<br>P<0,0001 | 38,30%<br>F (9, 32) = 38,46<br>P<0,0001 |                         |               |
|                     | %DO                          | 7,58%<br>F (3, 32) = 19,77<br>P<0,0001  | 39,62%<br>F (3, 32) = 103,3<br>P<0,0001 | 48,71%<br>F (9, 32) = 42,32<br>P<0,0001 |                         |               |
|                     | Cond.                        | 55,14%<br>F (3, 32) = 14278<br>P<0,0001 | 37,12%<br>F (3, 32) = 9611<br>P<0,0001  | 7,70%<br>F (9, 32) = 664,9<br>P<0,0001  |                         |               |
|                     | Sal.                         | 54,63%<br>F (3, 32) = 2137<br>P<0,0001  | 37,04%<br>F (3, 32) = 1449<br>P<0,0001  | 8,05%<br>F (9, 32) = 105,0<br>P<0,0001  |                         |               |
|                     | TDS                          | 55,12%<br>F (3, 32) = 14362<br>P<0,0001 | 37,68%<br>F (3, 32) = 9819<br>P<0,0001  | 7,16%<br>F (9, 32) = 622,1<br>P<0,0001  |                         |               |
|                     | NO <sub>3</sub> <sup>-</sup> | 67,06%<br>F (3, 32) = 1875<br>P<0,0001  | 25,92%<br>F (3, 32) = 724,7<br>P<0,0001 | 6,64%<br>F (9, 32) = 61,86<br>P<0,0001  |                         |               |
|                     | NO <sub>2</sub> <sup>-</sup> | 41,45%<br>F (3, 32) = 34202<br>P<0,0001 | 19,38%<br>F (3, 32) = 15994<br>P<0,0001 | 39,15%<br>F (9, 32) = 10769<br>P<0,0001 |                         |               |
|                     | NH <sub>4</sub> <sup>+</sup> | 55,77%<br>F (3, 32) = 26687<br>P<0,0001 | 14,23%<br>F (3, 32) = 6809<br>P<0,0001  | 29,97%<br>F (9, 32) = 4780<br>P<0,0001  |                         |               |
|                     | P                            | 53,18%<br>F (3, 32) = 65,11<br>P<0,0001 | 8,17%<br>F (3, 32) = 10,00<br>P<0,0001  | 29,95%<br>F (9, 32) = 12,22<br>P<0,0001 |                         |               |
|                     | COD                          | 3,40%<br>F (3, 32) = 53,64<br>P<0,0001  | 91,04%<br>F (3, 32) = 1435<br>P<0,0001  | 4,88%<br>F (9, 32) = 25,66<br>P<0,0001  |                         |               |
|                     | BOD <sub>5</sub>             | 7,39%<br>F (3, 32) = 20,24<br>P<0,0001  | 53,46%<br>F (3, 32) = 146,3<br>P<0,0001 | 35,25%<br>F (9, 32) = 32,16<br>P<0,0001 |                         |               |
| Costa-<br>Couros    | Temp.                        | 4,51%<br>F (3, 32) = 2408<br>P<0,0001   | 91,23%<br>F (3, 32) = 48706<br>P<0,0001 | 4,24%<br>F (9, 32) = 755,3<br>P<0,0001  |                         |               |

|       |                              |        |                               |        |                               |        |                               |
|-------|------------------------------|--------|-------------------------------|--------|-------------------------------|--------|-------------------------------|
| river | pH                           | 4,53%  | F (3, 32) = 217,4<br>P<0,0001 | 52,10% | F (3, 32) = 2502<br>P<0,0001  | 43,15% | F (9, 32) = 690,6<br>P<0,0001 |
|       |                              |        |                               |        |                               |        |                               |
|       | DO                           | 22,61% | F (3, 32) = 207,7<br>P<0,0001 | 51,12% | F (3, 32) = 469,5<br>P<0,0001 | 25,10% | F (9, 32) = 76,84<br>P<0,0001 |
|       |                              |        |                               |        |                               |        |                               |
|       | % DO                         | 20,48% | F (3, 32) = 221,5<br>P<0,0001 | 45,52% | F (3, 32) = 492,5<br>P<0,0001 | 33,02% | F (9, 32) = 119,1<br>P<0,0001 |
|       |                              |        |                               |        |                               |        |                               |
|       | Cond.                        | 47,41% | F (3, 32) = 4640<br>P<0,0001  | 9,77%  | F (3, 32) = 955,9<br>P<0,0001 | 42,71% | F (9, 32) = 1394<br>P<0,0001  |
|       |                              |        |                               |        |                               |        |                               |
|       | Sal.                         | 47,73% | F (3, 32) = 4857<br>P<0,0001  | 10,31% | F (3, 32) = 1049<br>P<0,0001  | 41,85% | F (9, 32) = 1420<br>P<0,0001  |
|       |                              |        |                               |        |                               |        |                               |
|       | TDS                          | 47,58% | F (3, 32) = 4304<br>P<0,0001  | 9,76%  | F (3, 32) = 882,7<br>P<0,0001 | 42,54% | F (9, 32) = 1283<br>P<0,0001  |
|       |                              |        |                               |        |                               |        |                               |
|       | NO <sub>3</sub> <sup>-</sup> | 10,95% | F (3, 32) = 491,8<br>P<0,0001 | 61,23% | F (3, 32) = 2749<br>P<0,0001  | 27,58% | F (9, 32) = 412,8<br>P<0,0001 |
|       |                              |        |                               |        |                               |        |                               |
|       | NO <sub>2</sub> <sup>-</sup> | 57,19% | F (3, 32) = 10408<br>P<0,0001 | 35,32% | F (3, 32) = 6428<br>P<0,0001  | 7,42%  | F (9, 32) = 450,2<br>P<0,0001 |
|       |                              |        |                               |        |                               |        |                               |
|       | NH <sub>4</sub> <sup>+</sup> | 41,81% | F (3, 32) = 95329<br>P<0,0001 | 24,68% | F (3, 32) = 56263<br>P<0,0001 | 33,51% | F (9, 32) = 25471<br>P<0,0001 |
|       |                              |        |                               |        |                               |        |                               |
|       | P                            | 38,86% | F (3, 32) = 166,6<br>P<0,0001 | 4,15%  | F (3, 32) = 17,80<br>P<0,0001 | 54,50% | F (9, 32) = 77,89<br>P<0,0001 |
|       |                              |        |                               |        |                               |        |                               |
|       | COD                          | 48,95% | F (3, 32) = 238,2<br>P<0,0001 | 5,20%  | F (3, 32) = 25,32<br>P<0,0001 | 43,66% | F (9, 32) = 70,82<br>P<0,0001 |
|       |                              |        |                               |        |                               |        |                               |
|       | BOD <sub>5</sub>             | 19,30% | F (3, 32) = 245,5<br>P<0,0001 | 56,88% | F (3, 32) = 723,3<br>P<0,0001 | 22,98% | F (9, 32) = 97,39<br>P<0,0001 |
|       |                              |        |                               |        |                               |        |                               |
